# Supplementary material for: Theoretical understanding of the in-plane tensile strain effects on enhancing the ferroelectric performance of Hf0.5Zr0.5O2 and ZrO2 thin films
Source: Royal Society of Chemistry journal article supplement (doi:10.1039/d4nr03333g), 2024-11-12
Supplement: d4nr03333g1.pdf [file d4nr03333g1.pdf]

## Supplementary Materials

### Theoretical Understanding of the In-plane Tensile Strain Effects on Enhancing the Ferroelectric Performance of $\text{Hf}_{0.5}\text{Zr}_{0.5}\text{O}_2$ and $\text{ZrO}_2$ Thin Films

Kun Hee Ye<sup>1,2</sup>, Taeyoung Jeong<sup>1,2</sup>, Seungjae Yoon<sup>1,2</sup>, Dohyun Kim<sup>1,2</sup>, Cheol Seong Hwang<sup>\*,2</sup>, and Jung-Hae Choi<sup>\*,1</sup>

<sup>1</sup>*Electronic Materials Research Center, Korea Institute of Science and Technology, Seoul 02792, Korea*

<sup>2</sup>*Department of Materials Science and Engineering and Inter-University Semiconductor Research Center, Seoul National University, Seoul 08826, Korea*

*\*Corresponding author;*

*Tel.: +82 2 880 7535. Fax: +82 2 884 1413*

*E-mail address: cheolsh@snu.ac.kr (C. S. Hwang)*

*Tel.: +82 2 958 5488. Fax: +82 2 958 6658*

*E-mail address: choijh@kist.re.kr (J.-H. Choi)*

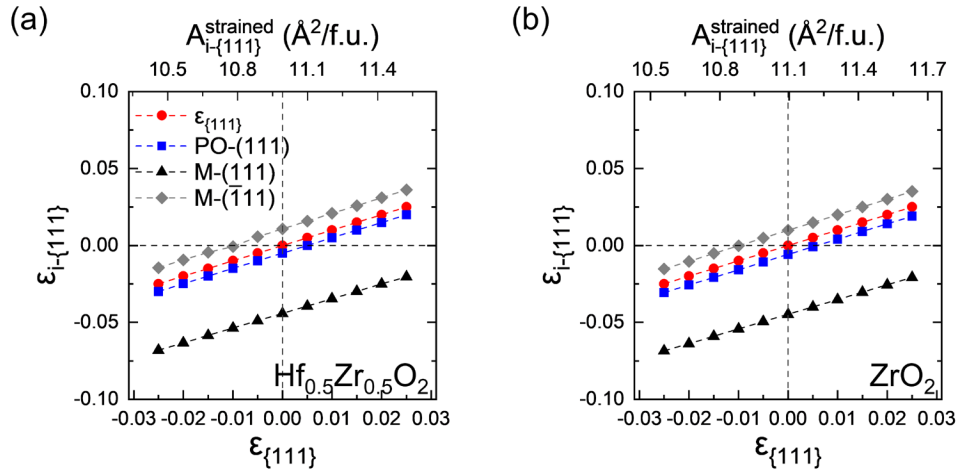

**Figure S1.**  $\varepsilon_{i-111}$  of the PO-(111) (blue), M-(111) (black), and M-( $\bar{1}11$ ) (gray) as a function of  $\varepsilon_{111}$  (lower x-axis) and  $A_{i-111}^{\text{strained}}$  (upper x-axis) in (a)  $\text{Hf}_{0.5}\text{Zr}_{0.5}\text{O}_2$  and (b)  $\text{ZrO}_2$ .  $\varepsilon_{i-111}$  is defined

as  $\sqrt{\frac{A_{i-111}^{\text{strained}}}{A_{i-111}^{\text{equil}}}} - 1$ , where  $A_{i-111}^{\text{equil}}$  represents the equilibrium in-plane area of the  $i$ -phase.  $\varepsilon_{111} =$

$\sqrt{\frac{A_{i-111}^{\text{strained}}}{A_{T-(111)}^{\text{equil}}}} - 1$  is also shown in red as a guide.

**Notes for Figure S1:** Due to the discrepancies in lattice parameters and consequent  $A_{i-111}^{\text{equil}}$  among polymorphs in Table I,  $\varepsilon_{i-111}$  values also differ among polymorphs for a given  $A_{i-111}^{\text{strained}}$  and  $\varepsilon_{111}$ . In  $\text{Hf}_{0.5}\text{Zr}_{0.5}\text{O}_2$ , for instance,  $\varepsilon_{M-(111)}$  is always negative, indicating the M-(111) undergoes the in-plane compressive strain compared to the M-phase in equilibrium for all  $\varepsilon_{111}$  range investigated. On the other hand, the M-( $\bar{1}11$ ) is under in-plane tensile strain (i. e., positive  $\varepsilon_{M-(\bar{1}11)}$ ) at  $\varepsilon_{111} > -0.005$ , while under in-plane compressive strain (i. e., negative  $\varepsilon_{M-(\bar{1}11)}$ ) at  $\varepsilon_{111} < -0.01$  compared to the M-phase in equilibrium.

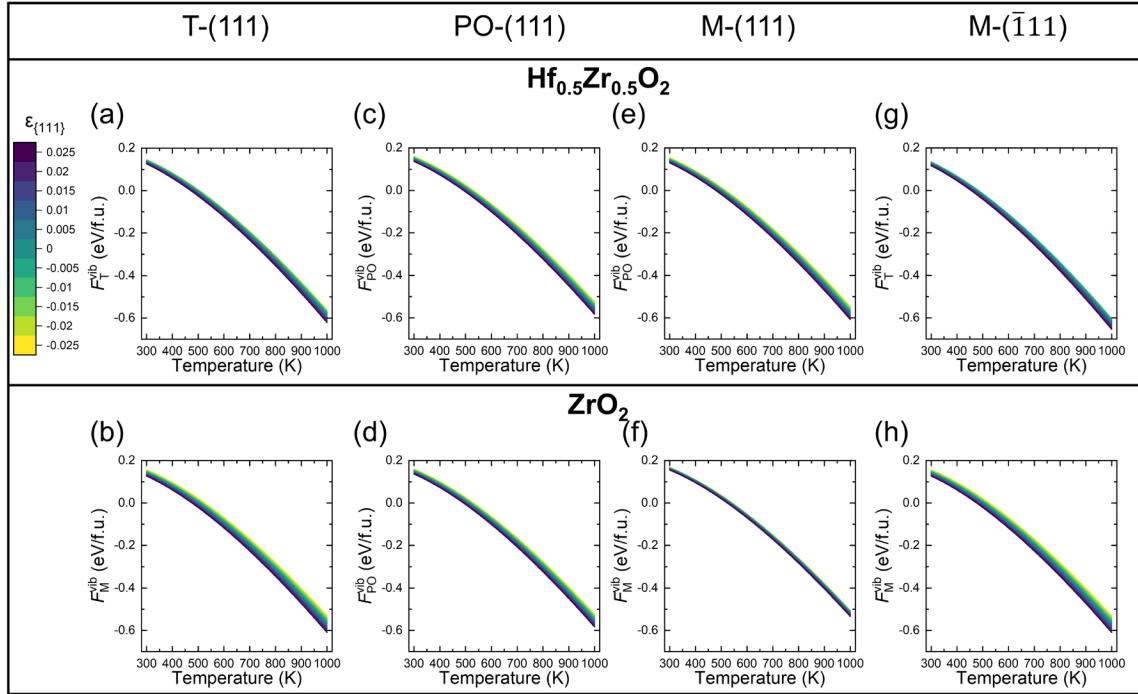

**Figure S2.**  $F_i^{\text{vib}}$  of (a,b) T-(111), (c,d) PO-(111), (e,f) M-(111), and (g,h) M-( $\bar{1}11$ ) depending on temperature in (a,c,e,g)  $\text{Hf}_{0.5}\text{Zr}_{0.5}\text{O}_2$  and (b,d,f,h)  $\text{ZrO}_2$ . The color bar represents the scale of  $\epsilon_{\{111\}}$ .

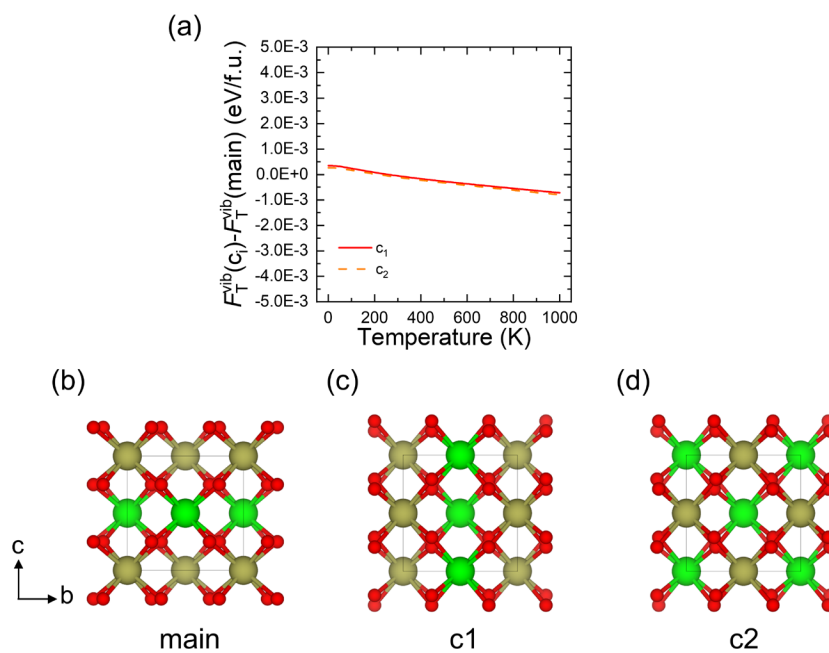

**Figure S3.** (a) Temperature- and configuration-dependent  $F_T^{yb}$  of the T-phase  $\text{Hf}_{0.5}\text{Zr}_{0.5}\text{O}_2$ . The cation configurations of the T-phase  $\text{Hf}_{0.5}\text{Zr}_{0.5}\text{O}_2$  are represented in (b~d).

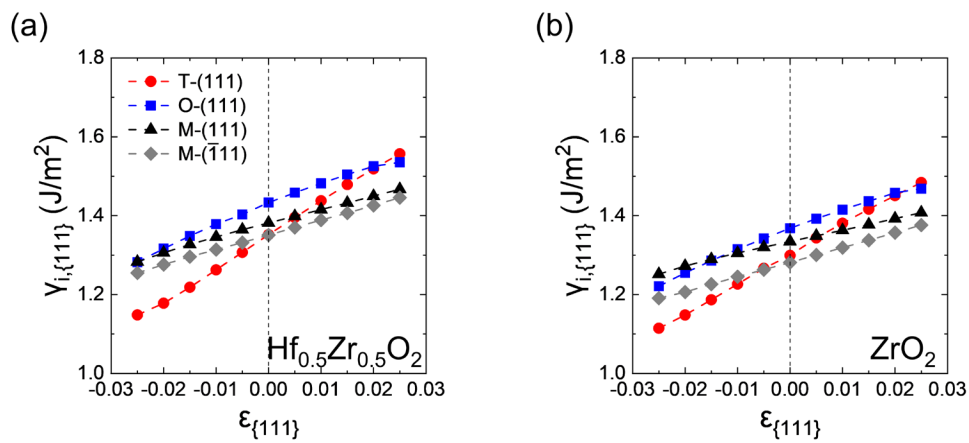

**Figure S4.**  $\gamma_{i,\{111\}}$  of T-(111), O-(111), M-(111), and M-( $\bar{1}\bar{1}\bar{1}$ ) depending on  $\epsilon_{\{111\}}$  in (a)  $\text{Hf}_{0.5}\text{Zr}_{0.5}\text{O}_2$  and (b)  $\text{ZrO}_2$ . The O-(111) represents the (111) plane of the antipolar orthorhombic structure.

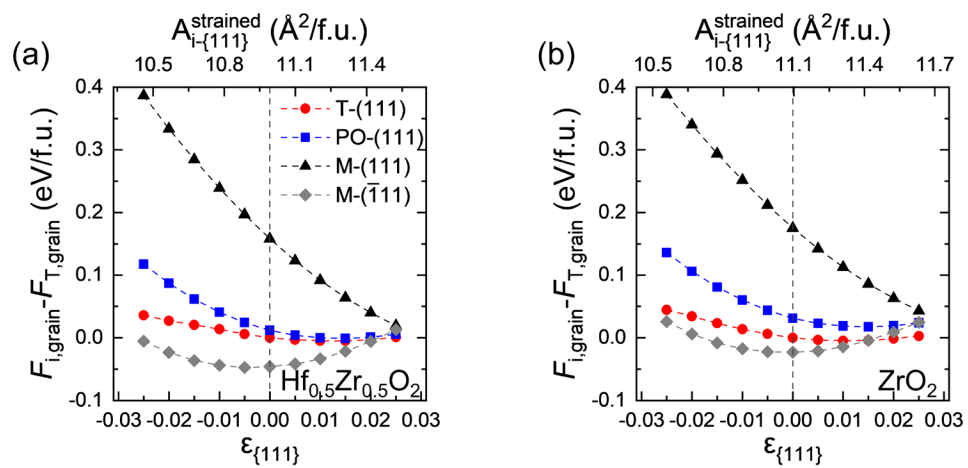

**Figure S5.**  $F_{i,grain}$  at 1000 K for the T-(111), PO-(111), M-(111), and M-( $\bar{1}\bar{1}\bar{1}$ ) grains as a function of  $\epsilon_{\{111\}}$  (lower x-axis) and  $A_{i-\{111\}}^{strained}$  (upper x-axis) in (a)  $\text{Hf}_{0.5}\text{Zr}_{0.5}\text{O}_2$  and (b)  $\text{ZrO}_2$ .

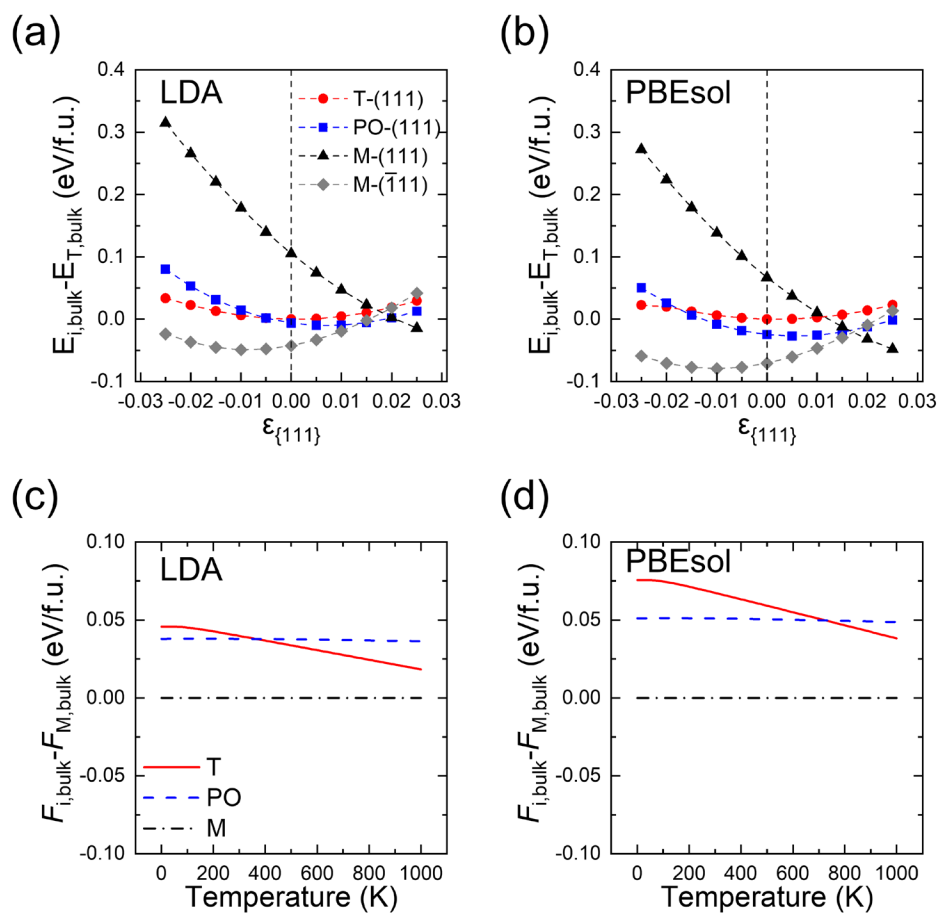

**Figure S6.** (a,b)  $\epsilon_{\{111\}}$ -dependent  $E_{i,bulk}$  of ZrO<sub>2</sub> calculated by (a) LDA and (b) PBEsol functionals. (c,d) Temperature-dependent  $F_{i,bulk}$  of ZrO<sub>2</sub> calculated by (c) LDA and (d) PBEsol functionals.

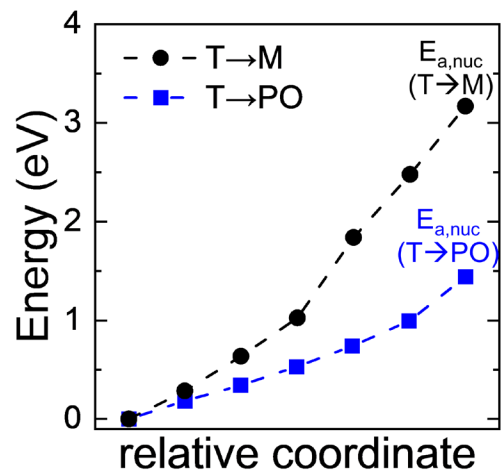

**Figure S7.** Energy profiles during the nucleation of a single unitcell of M- and PO-phases in  $3 \times 3 \times 3$  T-phase supercell using the nudged elastic band method.



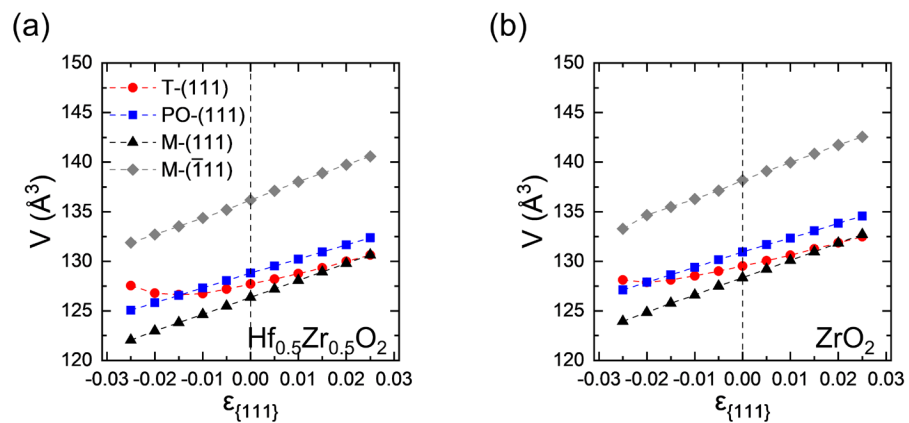

**Figure S8.** Conventional unit cell volume of the T-(111), PO-(111), M-(111), and M-( $\bar{1}\bar{1}\bar{1}$ ) grains depending on  $\epsilon_{\{111\}}$  in (a)  $\text{Hf}_{0.5}\text{Zr}_{0.5}\text{O}_2$  and (b)  $\text{ZrO}_2$ .

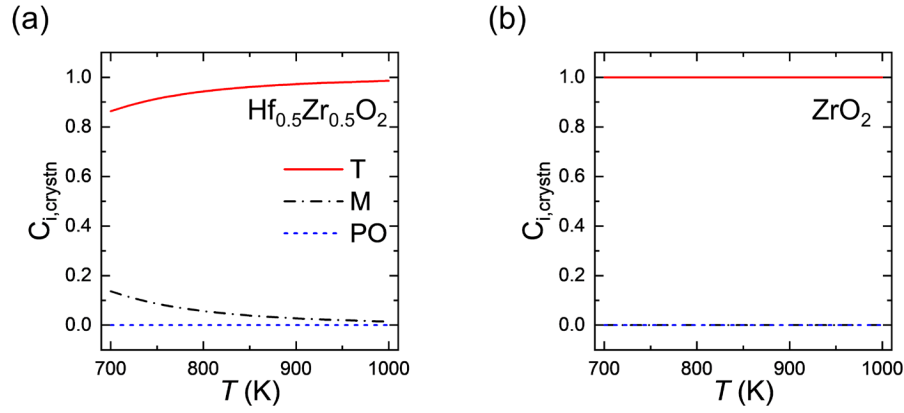

**Figure S9.**  $T$ -dependent phase fraction of the T-, M-, and PO-phases crystallized from amorphous ( $C_{T,crystrn}$ ,  $C_{M,crystrn}$ , and  $C_{PO,crystrn}$ ) in (a)  $Hf_{0.5}Zr_{0.5}O_2$  and (b)  $ZrO_2$ .

**Notes for Figure S9:** The crystallization rate,  $R_{i,crystrn}$ , was calculated as;

$$R_{i,crystrn} = N_s v_0 \exp\left(\frac{-\Delta F_i^*}{k_B T_{crystrn}}\right)$$

, where the  $\Delta F_i^*$  is the crystallization barrier of the  $i$ -phase described in the previous study [1]. The differences in pre-exponential factors of  $N_s$  (the number of nucleation sites) and  $v_0$  among polymorphs were assumed to be negligible. Using the  $R_{i,crystrn}$ ,  $C_{i,crystrn}$  was calculated by the following equation.

$$C_{i,crystrn} = \frac{R_{i,crystrn}}{R_{M,crystrn} + R_{T,crystrn} + R_{PO,crystrn}}$$

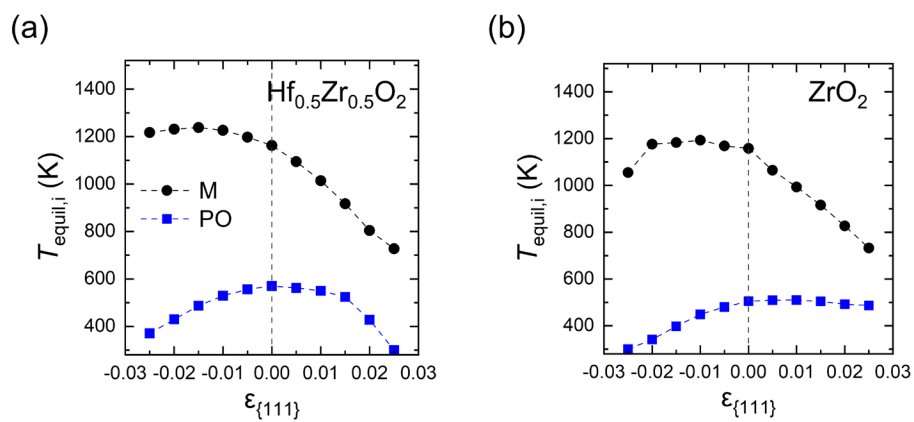

**Figure S10.**  $\epsilon_{\{111\}}$ -dependent equilibrium temperatures of M- and PO-phases ( $T_{\text{equil},M}$  and  $T_{\text{equil},PO}$ ) in (a)  $\text{Hf}_{0.5}\text{Zr}_{0.5}\text{O}_2$  and (b)  $\text{ZrO}_2$ .

**References**

- [1] K.H. Ye, I.W. Yeu, G. Han, T. Jeong, S. Yoon, D. Kim, C.S. Hwang, and J.H. Choi, “Comprehensive interpretations of thermodynamic and kinetic effects on the phase fractions in  $\text{Hf}_{1-x}\text{Zr}_x\text{O}_2$  by first principle calculations,” *Appl. Phys. Rev.* **10**, 031419 (2023).
